# Supplementary material for: Predictive accuracy of enhanced versions of the on-admission National Early Warning Score in estimating the risk of COVID-19 for unplanned admission to hospital: a retrospective development and validation study
Source: Springer Nature journal article supplement (doi:10.1186/s12913-021-06951-x), 2021-09-12
Supplement: MOESM1 [file 19655738]

# Supplementary Digital Content

## NEWS models (M0, M1, M2)

### Model M0

$$\text{Logit}(\text{COVID}) = -3.064 + 0.232 * \text{NEWS}$$

### Model M1

$$\text{Logit}(\text{COVID}) = -3.881 + 0.168 * \text{Male} + 0.011 * \text{Age} + 0.224 * \text{NEWS}$$

### Model M2

$$\begin{aligned} \text{Logit}(\text{COVID}) &= -5.500 + 0.126 * \text{Male} + 0.009 * \text{Age} - 0.069 * \text{NEWS} + 1.770 \\ &* \log(\text{Respiratory Rate}) + 0.286 * \text{Temperature} - 0.941 \\ &* \log(\text{Systolic pressure}) - 0.211 * \log(\text{Diastolic pressure}) + 0.300 \\ &* \log(\text{Pulse rate}) - 0.097 * \text{Oxygen Saturations} + 1.184 \\ &* \text{Oxygen Supplementation} - 1.462 * \text{Pain} + 0.505 * \text{Voice} - 8.393 \\ &* \text{Unconscious} \end{aligned}$$

We accounted for baseline difference in risk of COVID-19 in the external validation data by adding (M0: 0.19, M1:0.18, M2:0.19) to the NEWS based models using an iterative procedure described elsewhere<sup>1</sup>

1. Faisal M, Howes R, Steyerberg EW, Richardson D, Mohammed MA. Using routine blood test results to predict the risk of death for emergency medical admissions to hospital: an external model validation study. QJM [Internet]. 2017 Jan 1 [cited 2017 Oct 2];110(1):27–31. Available from: <https://academic.oup.com/qjmed/article-lookup/doi/10.1093/qjmed/hcw110>

## NEWS2 models (M0', M1', M2')

### Model M0'

$$\text{Logit}(\text{COVID}) = -3.131 + 0.219 * \text{NEWS2}$$

### Model M1'

$$\text{Logit}(\text{COVID}) = -3.946 + 0.181 * \text{Male} + 0.011 * \text{Age} + 0.213 * \text{NEWS2}$$

### Model M2'

$$\begin{aligned} \text{Logit}(\text{COVID}) &= -4.147 + 0.114 * \text{Male} + 0.009 * \text{Age} + 0.006 * \text{NEWS2} + 1.416 \\ &* \log(\text{Respiratory Rate}) + 0.287 * \text{Temperature} - 0.756 \\ &* \log(\text{Systolic pressure}) - 0.348 * \log(\text{Diastolic pressure}) + 0.167 \\ &* \log(\text{Pulse rate}) - 0.099 * \text{Oxygen Saturations} + 0.797 \\ &* \text{Oxygen Supplementation} - 2.185 * \text{Pain} + 0.120 * \text{Voice} - 8.889 \\ &* \text{Unconscious} + 0.390 * \text{Baseline Confusion} + 0.270 * \text{New Confusion} \\ &- 0.868 * \text{Scale2} + 0.046 * \text{Oxygen Flow Rate} \end{aligned}$$

We accounted for baseline difference in risk of COVID-19 in the external validation data by adding (M0': 0.18, M1':0.17, M2':0.18) to the NEWS2 based models using an iterative procedure described elsewhere<sup>1</sup>

1. Faisal M, Howes R, Steyerberg EW, Richardson D, Mohammed MA. Using routine blood test results to predict the risk of death for emergency medical admissions to hospital: an external model validation study. QJM [Internet]. 2017 Jan 1 [cited 2017 Oct 2];110(1):27–31. Available from: <https://academic.oup.com/qjmed/article-lookup/doi/10.1093/qjmed/hcw110>

**Table S1:NEWS scoring chart**

| Physiological Parameters | 3     | 2        | 1           | 0           | 1           | 2         | 3                           |
|--------------------------|-------|----------|-------------|-------------|-------------|-----------|-----------------------------|
| Respiration Rate         | ≤8    |          | 9 - 11      | 12 - 20     |             | 21 - 24   | ≥25                         |
| Oxygen Saturations       | ≤91   | 92 - 93  | 94 - 95     | ≥96         |             |           |                             |
| Any Supplemental Oxygen  |       | Yes      |             | No          |             |           |                             |
| Temperature              | ≤35.0 |          | 35.1 - 36.0 | 36.1 - 38.0 | 38.1 - 39.0 | ≥39.1     |                             |
| Systolic BP              | ≤90   | 91 - 100 | 101 - 110   | 111 - 219   |             |           | ≥220                        |
| Heart Rate               | ≤40   |          | 41 - 50     | 51-90       | 91 - 110    | 111 - 130 | ≥131                        |
| Level of Consciousness   |       |          |             | Alert       |             |           | Voice, Pain, or Unconscious |

**Table S2: NEWS2 scoring chart**

| Physiological Parameters | 3     | 2        | 1           | 0                     | 1                 | 2                 | 3                                      |
|--------------------------|-------|----------|-------------|-----------------------|-------------------|-------------------|----------------------------------------|
| Respiration Rate         | ≤8    |          | 9 - 11      | 12 - 20               |                   | 21 - 24           | ≥25                                    |
| SpO2 Scale 1 (%)         | ≤91   | 92 - 93  | 94 - 95     | ≥96                   |                   |                   |                                        |
| SpO2 Scale 2 (%)         | ≤83   | 84 - 85  | 86 - 87     | 88 - 92<br>≥93 on Air | 93 – 94 on oxygen | 95 – 96 on oxygen | ≥97 on oxygen                          |
| Oxygen Saturations       | ≤91   | 92 - 93  | 94 - 95     | ≥96                   |                   |                   |                                        |
| Air or oxygen?           |       | Oxygen   |             | Air                   |                   |                   |                                        |
| Temperature              | ≤35.0 |          | 35.1 - 36.0 | 36.1 - 38.0           | 38.1 - 39.0       | ≥39.1             |                                        |
| Systolic BP              | ≤90   | 91 - 100 | 101 - 110   | 111 - 219             |                   |                   | ≥220                                   |
| Heart Rate               | ≤40   |          | 41 - 50     | 51-90                 | 91 - 110          | 111 - 130         | ≥131                                   |
| Level of Consciousness   |       |          |             | Alert                 |                   |                   | Voice, Pain, Confusion, or Unconscious |

The NEWS [<https://www.rcplondon.ac.uk/projects/outputs/national-early-warning-score-news>] is based on a scoring system in which a score is allocated to vital signs physiological measurements already undertaken when patients present to or are being monitored in hospital. A score is allocated to each as they are measured, the magnitude of the score reflecting how extreme the parameter varies from the norm. This score is then aggregated, and uplifted for people requiring oxygen.

| <b>Characteristic</b>                                                     | <b>Development dataset (YH)</b> | <b>Validation dataset (SH)</b> | <b>All</b>         |
|---------------------------------------------------------------------------|---------------------------------|--------------------------------|--------------------|
|                                                                           | <b>N (%)</b>                    | <b>N (%)</b>                   | <b>N (%)</b>       |
| <b>Total emergency medical discharges between 11 Mar 20 to 13 June 20</b> | <b>3952</b>                     | <b>2528</b>                    | <b>6480</b>        |
| <b>Excluded: No NEWS recorded (%)</b>                                     | <b>13 (0.3)</b>                 | <b>6 (0.2)</b>                 | <b>19 (0.3)</b>    |
| <b>Excluded: First NEWS after 24 hours of admission (%)</b>               | <b>15 (0.4)</b>                 | <b>2 (0.1)</b>                 | <b>17 (0.3)</b>    |
| <b>Total excluded (%)</b>                                                 | <b>28 (0.7)</b>                 | <b>8 (0.3)</b>                 | <b>36 (0.6)</b>    |
| <b>Total included (%)</b>                                                 | <b>3924 (99.3)</b>              | <b>2520 (99.7)</b>             | <b>6444 (99.4)</b> |

**Table S3 Number of emergency medical admissions included/excluded**

# Deteriorating Patient Escalation Policy

| NEWS SCORE                                            |                                                                                                                                                                    | Clinical Response                                                                                                                                                                                                                                                                                                                                                                                                           |                                                                                                                                                                                                                                                                                                                                                                                                                                                                                                                                                                                                                   |
|-------------------------------------------------------|--------------------------------------------------------------------------------------------------------------------------------------------------------------------|-----------------------------------------------------------------------------------------------------------------------------------------------------------------------------------------------------------------------------------------------------------------------------------------------------------------------------------------------------------------------------------------------------------------------------|-------------------------------------------------------------------------------------------------------------------------------------------------------------------------------------------------------------------------------------------------------------------------------------------------------------------------------------------------------------------------------------------------------------------------------------------------------------------------------------------------------------------------------------------------------------------------------------------------------------------|
| For NEWS SCORE <b>0–2</b> continue routine monitoring |                                                                                                                                                                    |                                                                                                                                                                                                                                                                                                                                                                                                                             |                                                                                                                                                                                                                                                                                                                                                                                                                                                                                                                                                                                                                   |
| <b>3</b><br><b>LOW</b><br><b>4</b>                    | <b>3-4 or Clinical Concern</b><br><br><b>Monitor Minimum 4 hourly</b>                                                                                              | <b>RN</b> <ul style="list-style-type: none"> <li>Inform nurse in charge</li> <li>RN to re-check observations and ensure appropriate nursing interventions have been completed, using the ABCDE assessment.</li> <li>Consider commencing fluid balance monitoring.</li> <li>Nurse in charge to decide if escalation of care to F1/F2 or ST1/2 is required.</li> </ul>                                                        | <b>DR</b> <ul style="list-style-type: none"> <li>If escalation is requested F1/F2 or ST1/2 to assess patient using ABCDE within <b>60 minutes</b>.</li> </ul>                                                                                                                                                                                                                                                                                                                                                                                                                                                     |
|                                                       | <b>5-6 Or 3 in one parameter Or Urine output &lt;30ml/hour for 2 consecutive hours Or Increasing oxygen demand to &gt;60%</b><br><br><b>Monitor Minimum hourly</b> | <b>RN</b> <ul style="list-style-type: none"> <li>Inform nurse in charge</li> <li>RN to re-check observations and ensure appropriate nursing interventions have been completed, using the ABCDE assessment.</li> <li>Commence fluid balance monitoring.</li> <li>Immediately contact F1/F2 or ST1/2 and ask for patient review within <b>30 minutes</b>.</li> <li>Consider informing critical care outreach team.</li> </ul> | <b>DR</b> <ul style="list-style-type: none"> <li>F1/F2 or ST1/2 to assess patient using the ABCDE within <b>30 minutes</b>.</li> <li>Document management plan to include:               <ul style="list-style-type: none"> <li>- treatment required</li> <li>- relevant investigations</li> <li>- escalation plan</li> <li>- re-review details</li> </ul> </li> </ul>                                                                                                                                                                                                                                             |
| <b>6</b><br><b>MEDIUM</b><br><b>7</b>                 | <b>7 or more</b><br><br><b>Monitor every 15-30 minutes</b>                                                                                                         | <b>RN</b> <p><b>Do you need 2222 now?</b></p> <ul style="list-style-type: none"> <li>Urgently inform the medical team (ST3) caring for the patient, and ensure appropriate nursing interventions have been completed, using the ABCDE assessment.</li> <li>Immediately inform critical care outreach.</li> </ul>                                                                                                            | <b>DR</b> <ul style="list-style-type: none"> <li><b>Immediate</b> medical assessment by Registrar (ST3) or above.</li> <li>If F1/F2 or ST1/2 present to contact Registrar or Consultant immediately for review in person.</li> <li>If Registrar does not attend within <b>15 minutes</b> escalate to Consultant.</li> <li>Registrar to contact critical care team for advice if deteriorating further despite interventions.</li> <li>If critical care admission required Consultant to Consultant referral should be made.</li> <li>Registrar or above to document DNACPR status and ceiling of care.</li> </ul> |

Figure S1 Escalation policy of deteriorating patients in York Teaching Hospital NHS Foundation Trust

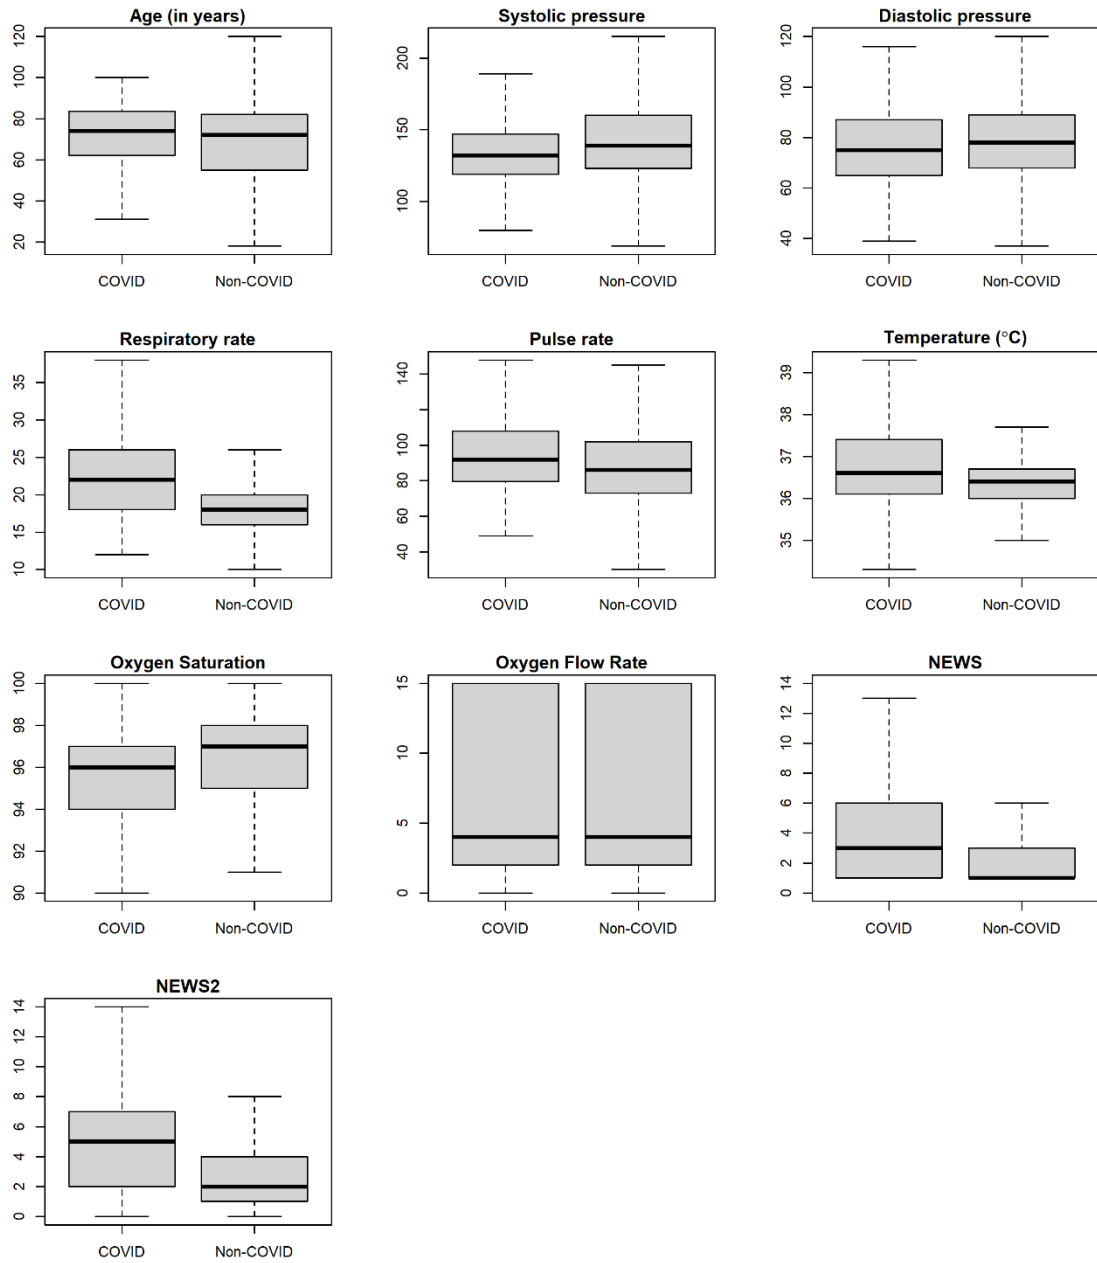

**Figure S2** Boxplot for continuous covariates without outliers to COVID-19 (Yes/No) for development dataset.

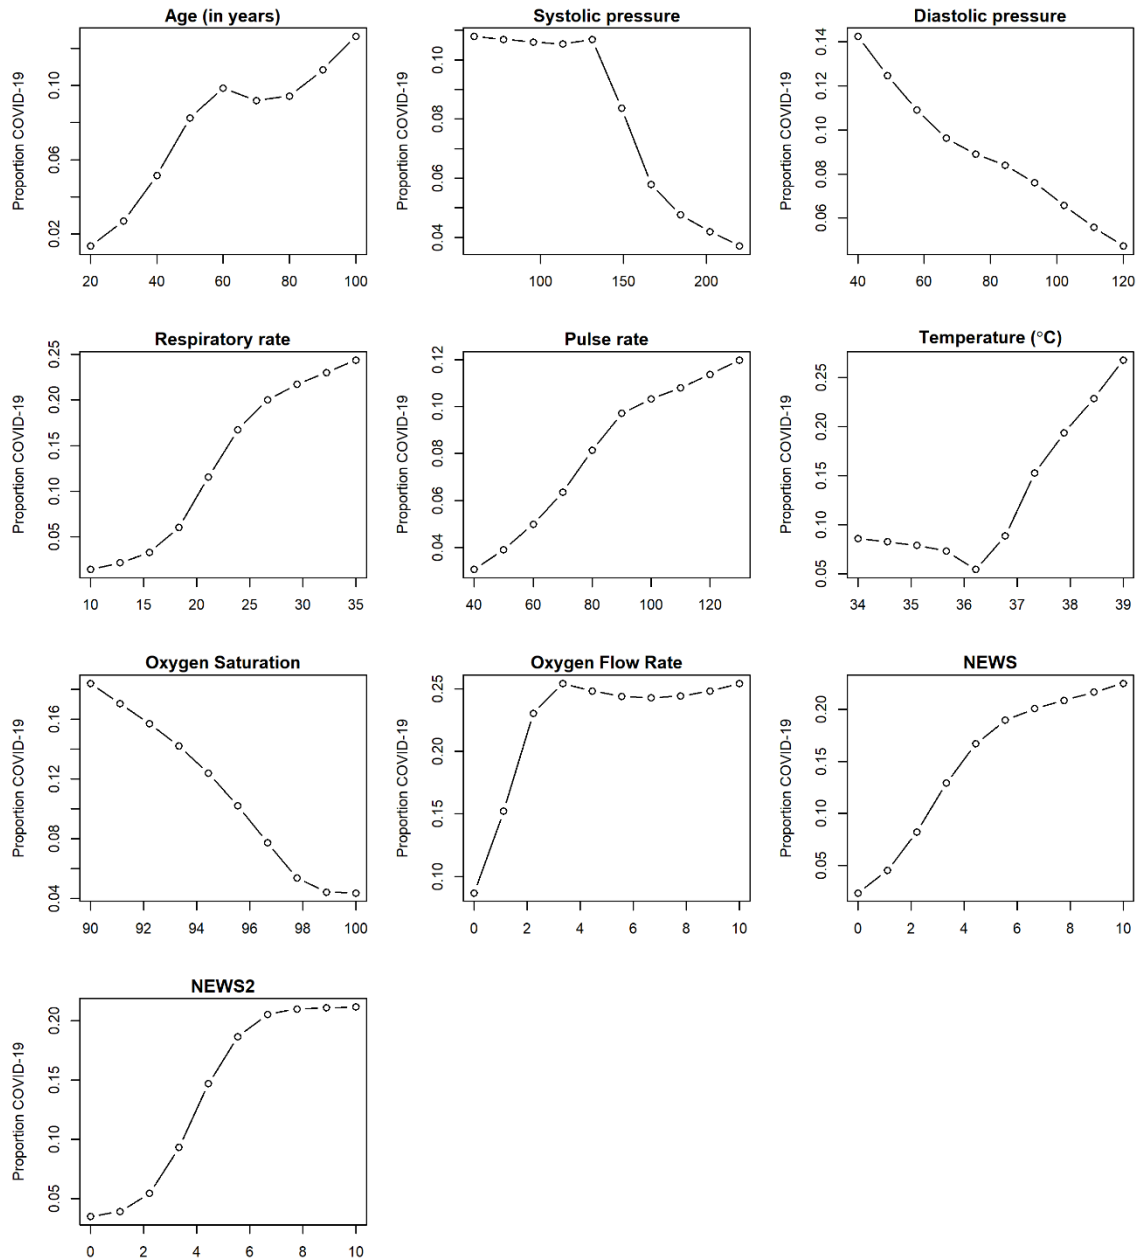

**Figure S3** Scatter plots showing the observed risk of COVID-19 with continuous covariates for the development dataset.

**NB:** y-axis range changes in each plot.

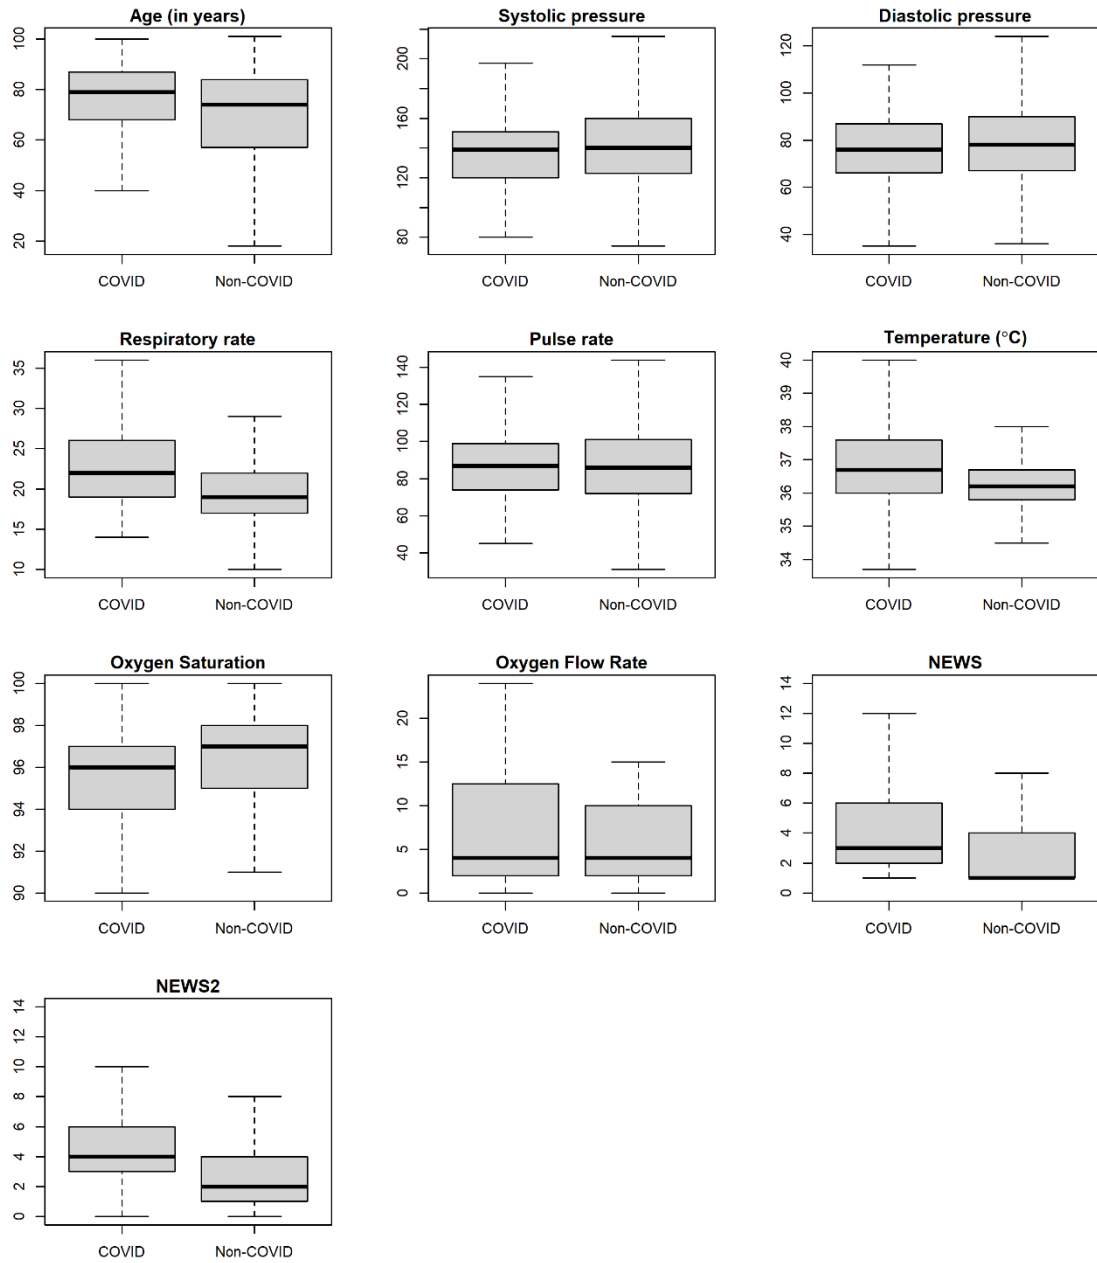

**Figure S4** Boxplot for continuous covariates without outliers to COVID-19 (Yes/No) for validation dataset.



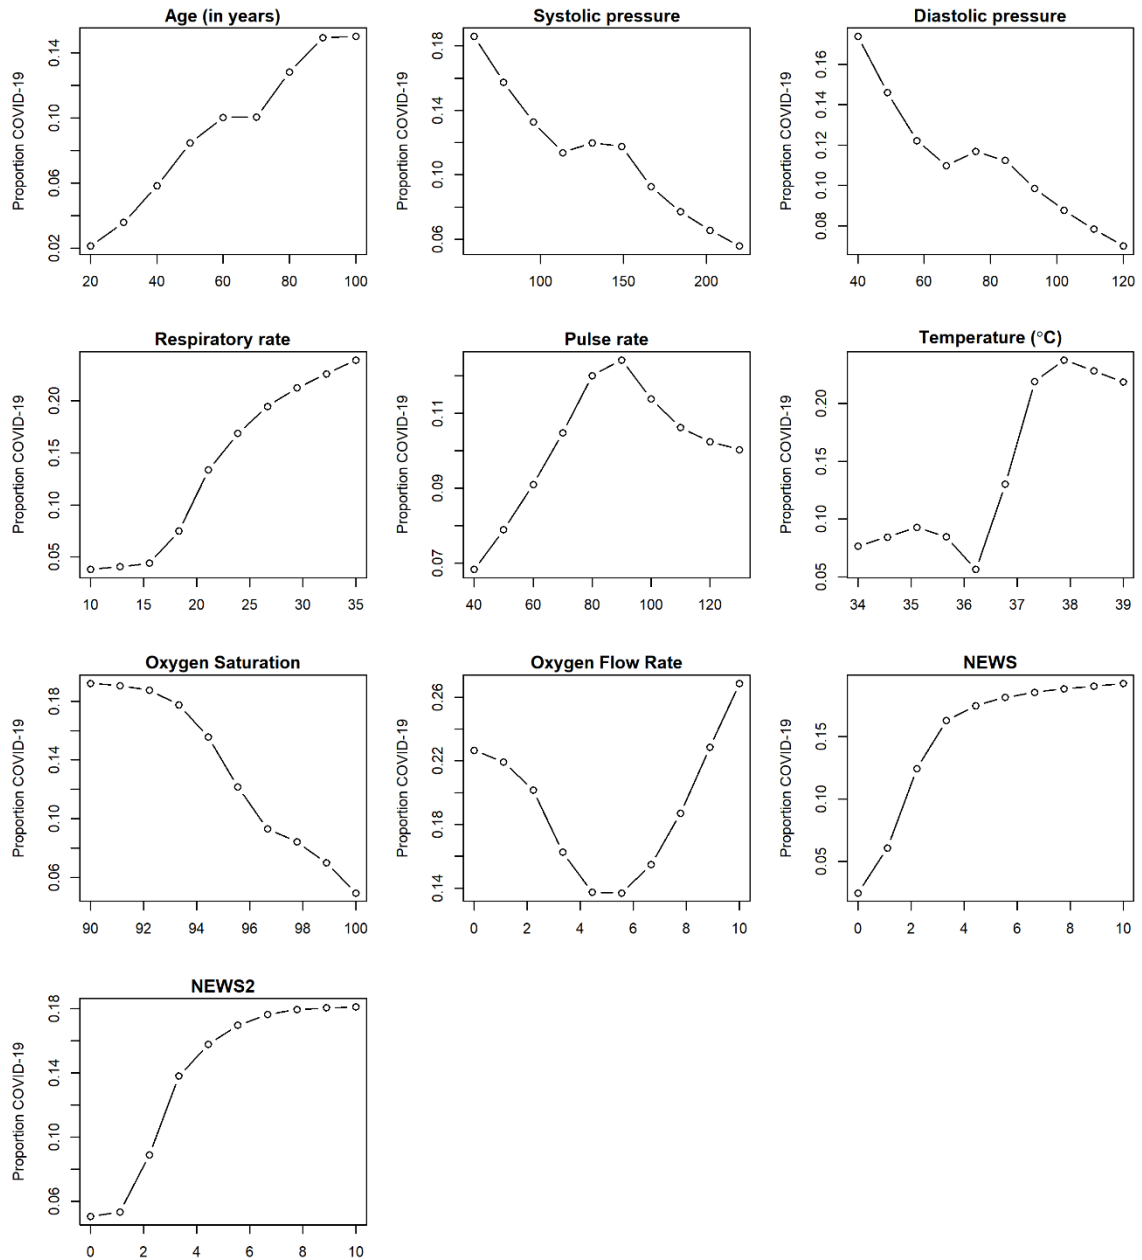

**Figure S5 Scatter plots showing the observed risk of COVID-19 with continuous covariates for validation dataset**

**NB: y-axis range changes in each plot.**

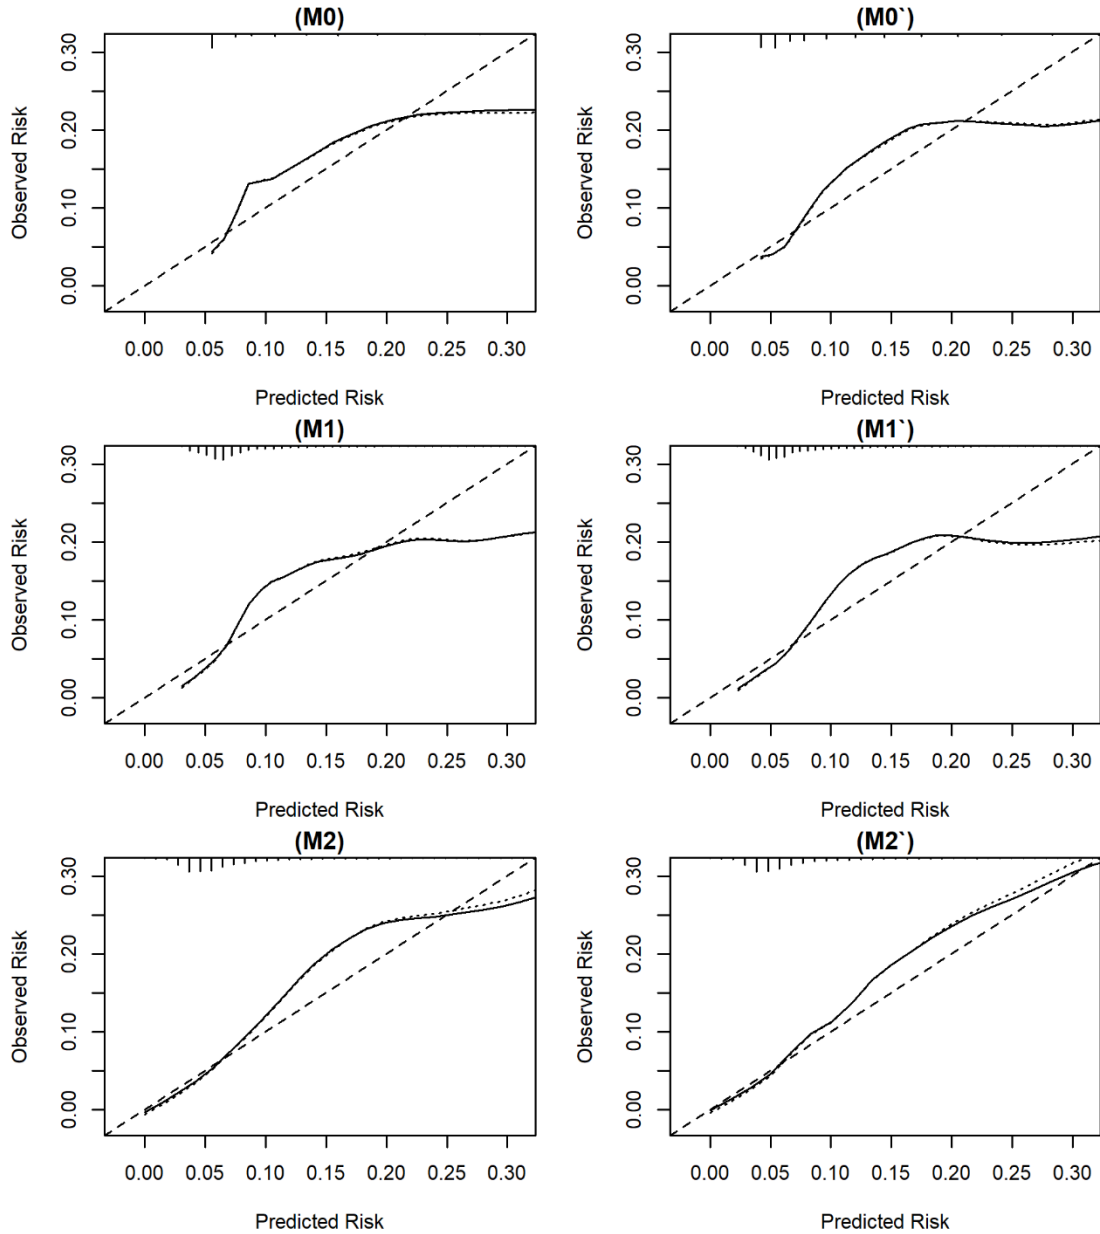

**Figure S6 Internal calibration of NEWS models (M0, M1, M2) and NEWS2 models (M0',M1',M2') for predicting the risk of COVID-19 in the development dataset**

**NB:** We limit the risk of COVID-19 to 0.30 for visualisation purposes because beyond this point, we have few patients. The dashed line shows ideal calibration. The dotted line shows apparent calibration and the solid line shows bias-corrected calibration.

| Model | Development dataset |                 |                        |                        |                                |      |
|-------|---------------------|-----------------|------------------------|------------------------|--------------------------------|------|
|       | Mean Risk Non-COVID | Mean Risk COVID | Scaled Brier Score (%) | c-statistic (95% CIs)  | Optimism-corrected c-statistic | AIC  |
| M0    | 0.08                | 0.12            | 3.41                   | 0.69<br>(0.67 to 0.72) | 0.70                           | 2197 |
| M1    | 0.08                | 0.13            | 3.56                   | 0.71<br>(0.68 to 0.74) | 0.71                           | 2189 |
| M2    | 0.08                | 0.18            | 9.08                   | 0.77<br>(0.75 to 0.8)  | 0.77                           | 2049 |
| M0`   | 0.08                | 0.13            | 3.89                   | 0.71<br>(0.68 to 0.74) | 0.71                           | 2171 |
| M1`   | 0.08                | 0.13            | 3.99                   | 0.72<br>(0.7 to 0.75)  | 0.72                           | 2162 |
| M2`   | 0.08                | 0.19            | 10.16                  | 0.78<br>(0.75 to 0.81) | 0.77                           | 2034 |

**Table S4: Performance of NEWS models (M0, M1, M2) and NEWS2 models (M0',M1',M2') for predicting the risk of COVID on admission for development dataset**

CIs: confidence intervals

| Comparison | Likelihood ratio test | Degree of freedom (DF) | P-value |
|------------|-----------------------|------------------------|---------|
| M0 vs M1   | 12.26                 | 2                      | 0.002   |
| M0 vs M2   | 171.78                | 12                     | <0.001  |
| M1 vs M2   | 159.52                | 10                     | <0.001  |
| M0' vs M1' | 12.31                 | 2                      | 0.002   |
| M0' vs M2' | 168.51                | 16                     | <0.001  |
| M1' vs M2' | 156.20                | 14                     | <0.001  |

**Table S5: Likelihood ratio tests for comparing NEWS models (M0, M1, M2) and NEWS2 models (M0',M1',M2') for predicting the risk of COVID on admission for development dataset**

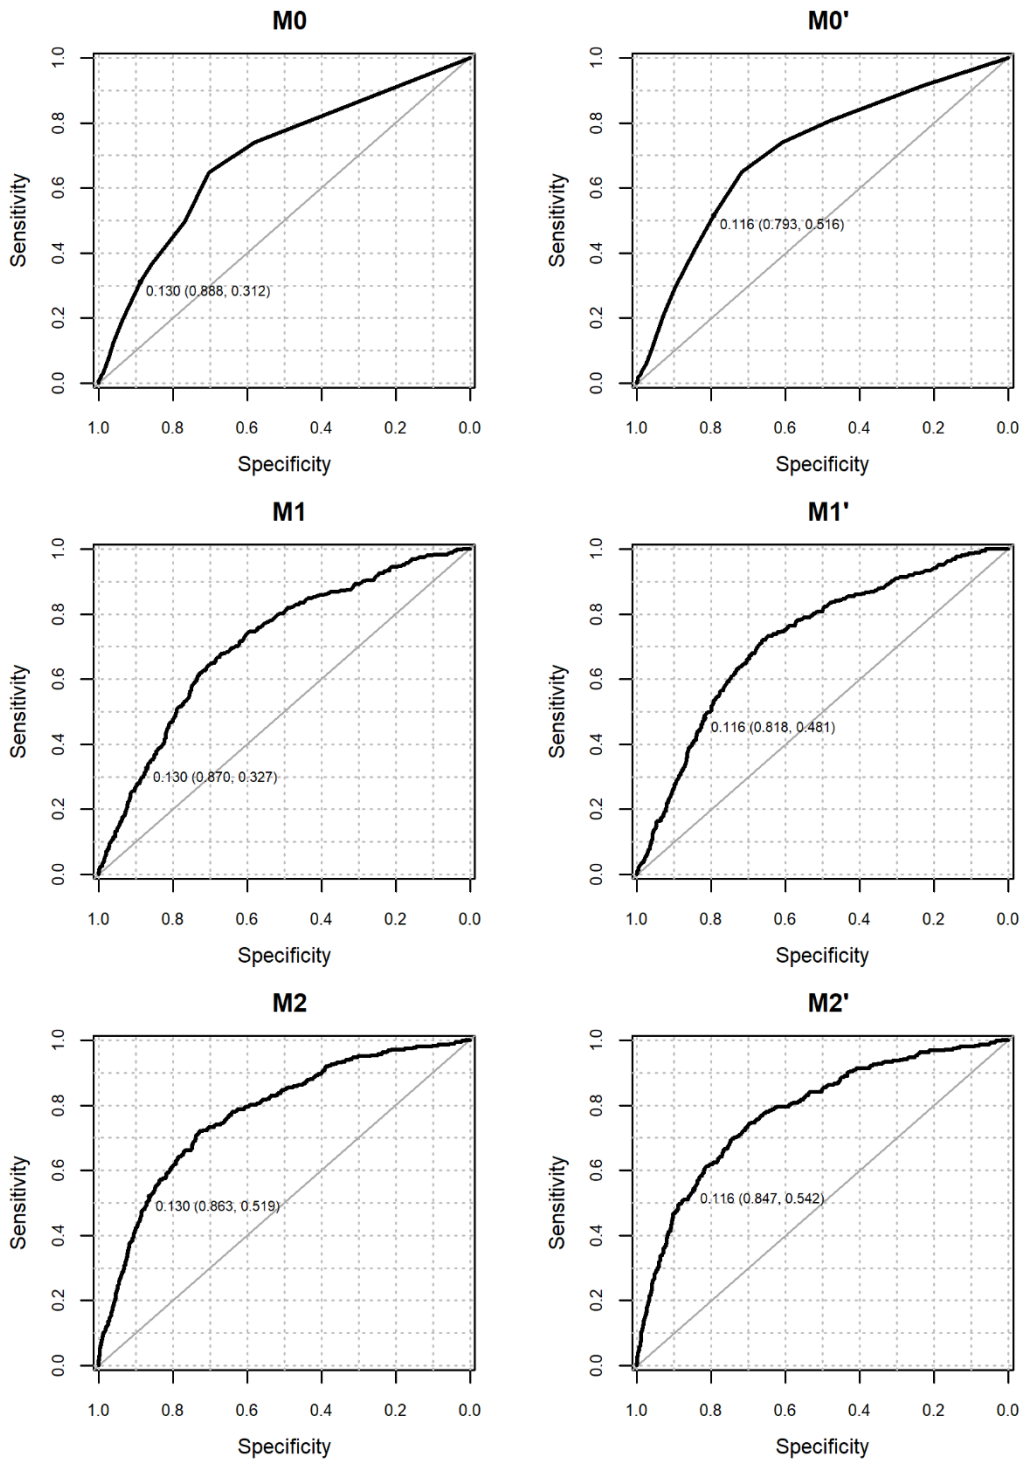

**Figure S7 Receiver Operating Characteristic curve for NEWS models (M0, M1, M2) and NEWS2 models (M0',M1',M2') in predicting the risk of COVID-19 in the development dataset**

Note: predicted probability at NEWS (or NEWS2) threshold  $\geq 5$  (sensitivity, specificity) is shown for all models.

| Model | Number of positive cases identified by model | Sensitivity%           | Specificity%           | PPV                    | NPV                    | LR+                 | LR-                 |
|-------|----------------------------------------------|------------------------|------------------------|------------------------|------------------------|---------------------|---------------------|
| M0    | 508                                          | 31.2<br>(26.3 to 36.4) | 88.8<br>(87.7 to 89.8) | 21.1<br>(17.6 to 24.9) | 93.1<br>(92.2 to 93.9) | 2.8<br>(2.3 to 3.3) | 0.8<br>(0.7 to 0.8) |
| M1    | 577                                          | 32.7<br>(27.7 to 37.9) | 87<br>(85.9 to 88.1)   | 19.4<br>(16.3 to 22.9) | 93.1<br>(92.2 to 93.9) | 2.5<br>(2.1 to 3)   | 0.8<br>(0.7 to 0.8) |
| M2    | 669                                          | 51.9<br>(46.5 to 57.3) | 86.3<br>(85.1 to 87.4) | 26.6<br>(23.3 to 30.1) | 94.9<br>(94.1 to 95.7) | 3.8<br>(3.3 to 4.3) | 0.6<br>(0.5 to 0.6) |
| M0'   | 919                                          | 51.6<br>(46.2 to 57)   | 79.3<br>(77.9 to 80.6) | 19.3<br>(16.8 to 22)   | 94.5<br>(93.6 to 95.3) | 2.5<br>(2.2 to 2.8) | 0.6<br>(0.5 to 0.7) |
| M1'   | 818                                          | 48.1<br>(42.7 to 53.5) | 81.8<br>(80.5 to 83)   | 20.2<br>(17.5 to 23.1) | 94.3<br>(93.4 to 95.1) | 2.6<br>(2.3 to 3)   | 0.6<br>(0.6 to 0.7) |
| M2'   | 735                                          | 54.2<br>(48.8 to 59.6) | 84.7<br>(83.4 to 85.8) | 25.3<br>(22.2 to 28.6) | 95.1<br>(94.3 to 95.8) | 3.5<br>(3.1 to 4)   | 0.5<br>(0.5 to 0.6) |

**Table S6 Sensitivity analysis of NEWS models (M0, M1, M2) and NEWS2 models (M0', M1', M2') for predicting the risk of COVID at threshold  $\geq 5$  of NEWS (predicted probability of model M0 = 0.130) and NEWS2 (predicted probability of model M0' = 0.116) for development dataset.**

PPV=Positive Predictive Value; NPV= Negative Predictive Value; LR+=Positive Likelihood Ratio; LR-=Negative Likelihood Ratio

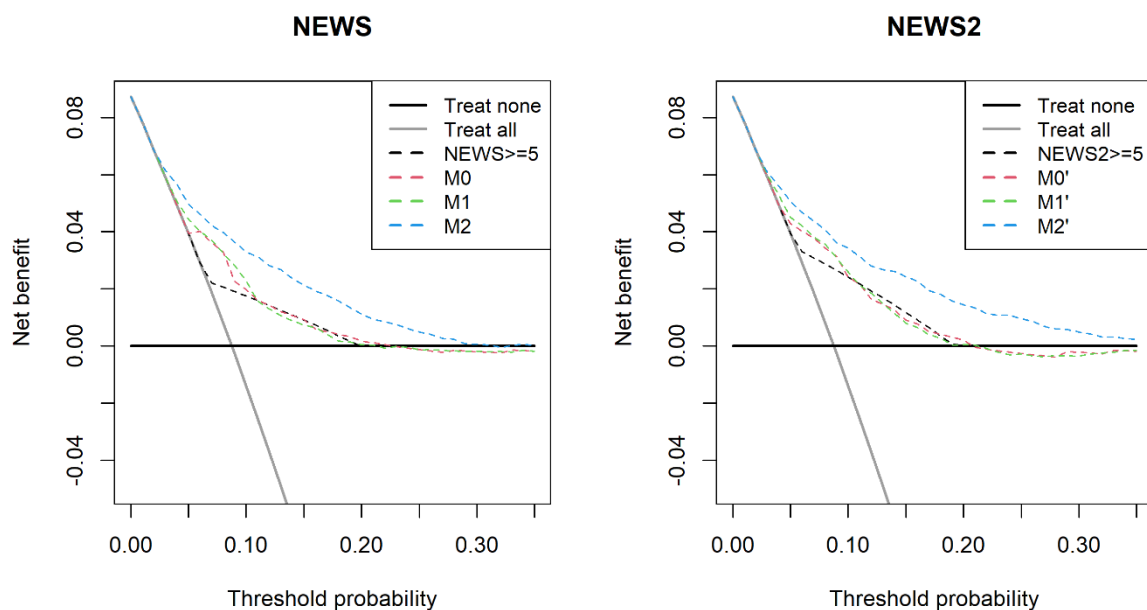

**Figure S8 Net Benefit for NEWS models (M0, M1, M2) and NEWS2 models (M0', M1', M2') in predicting the risk of COVID-19 in the development dataset.**
